# Supplementary material
Source: publisher figshare collection journal article supplement (https://acs.figshare.com/ndownloader/files/15025982)
Supplement: Supplementary file 1 [file 15025982]

## Supporting Information

# Towards Room-Temperature Magnetic Semiconductors in Two-Dimensional Ferrimagnetic Organometallic Lattice

*Xingxing Li and Jinlong Yang\**

Department of Chemical Physics, Hefei National Laboratory for Physical Sciences at  
the Microscale and Synergetic Innovation Center of Quantum Information &  
Quantum Physics, University of Science and Technology of China, Hefei, Anhui  
230026 (P. R. China)

### AUTHOR INFORMATION

#### **Corresponding Author**

\*jlYang@ustc.edu.cn

## Computational Methods

First principles calculations are conducted within the Perdew-Burke-Ernzerhof generalized gradient approximation (GGA)<sup>1</sup> with van der Waals interaction (vdW) correction using the DFT-D3 method<sup>2,3</sup> implemented in Vienna ab initio simulation package (VASP).<sup>4</sup> For structure optimization and test calculations, the PBE+U method<sup>5</sup> is used to treat the strong-correlation effect of transition metal's *3d* electrons, with Coulomb interaction parameter (U) and exchange interaction parameter (J) set to 4.0 and 1.0 eV, respectively.<sup>6</sup> To obtain accurate magnetic and electronic properties, the hybrid HSE06 functional is employed.<sup>7,8</sup> The projector augmented wave (PAW) potential<sup>9</sup> and the plane-wave cut-off energy of 520 eV are used. k-point meshes of  $4\times4\times1$  and  $6\times6\times1$  in the Monkhorst-Pack scheme are adopted during structure optimization and property calculation, respectively. Both the lattice constants and positions of all atoms are relaxed until the force is less than 0.01 eV/Å. The criterion for the total energy is set as  $1\times10^{-5}$  eV. To investigate the stability of DPP based organometallic frameworks, using PBE+U functional, phonon band structure is computed by the Phonopy package,<sup>10</sup> and ab initio molecular dynamics (AIMD) which last for 16 ps are performed in NVT ensemble at different temperatures (300 and 400 K) with a timestep of 1 fs.

Figures S1-S6

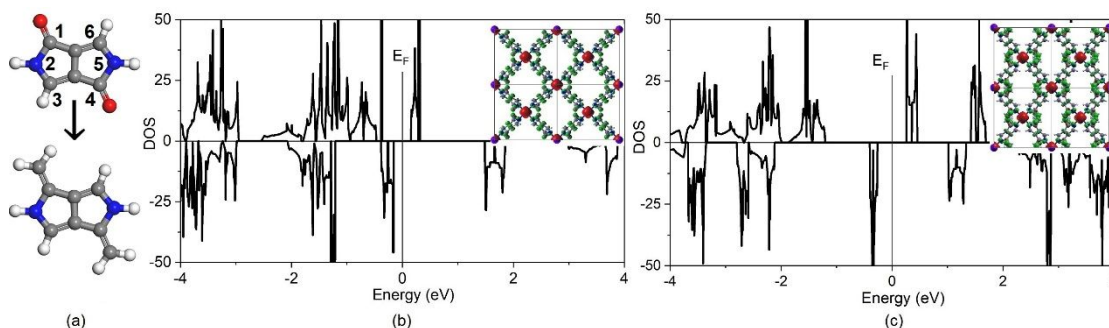

**Figure S1.** Test calculations of 2D Cr-DPP without and with methylene protection at PBE+U level. (a) is the scheme of replacing =O with isoelectronic =CH<sub>2</sub>. (b)-(c) are the density of states for 2D Cr-DPP before and after methylene protection, respectively. Insets are the spin density for ground ferrimagnetic state with an isovalue of 0.05 e/Å<sup>3</sup>. Fermi levels are set to

zero. One can find that the density of states around the Fermi level in (b)-(c) resemble each other with similar spin distribution.

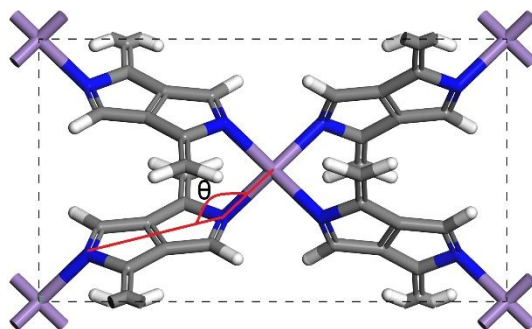

**Figure S2.** Optimized structure of 2D Mn-DPP. The Cr-N bond significantly deviates from the DPP plane with an angle about  $140^\circ$ .

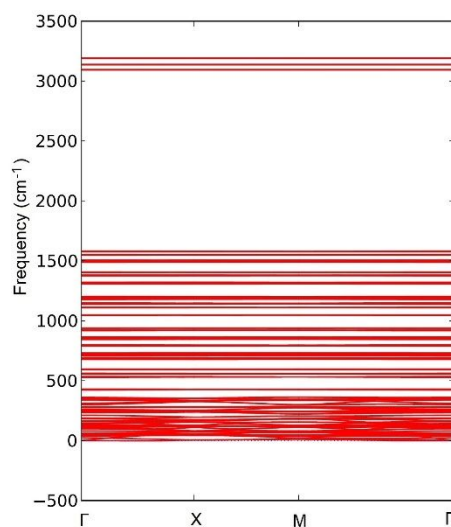

**Figure S3.** Phonon band structure of 2D Cr-DPP.

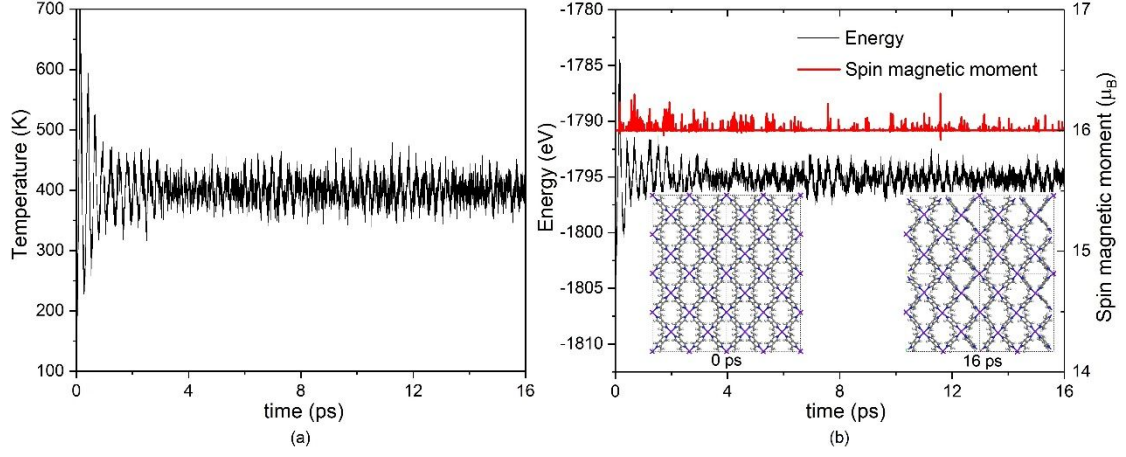

**Figure S4.** Ab initio molecular dynamics (AIMD) at 400 K for 2D Cr-DPP at PBE+U level. (a)-(b) are the fluctuation of temperature, energy and spin magnetic moment. Insets are the snapshots at 0 and 16 ps. No structure destruction is found, and 2D Cr-DPP is expected to stabilize at 400 K.

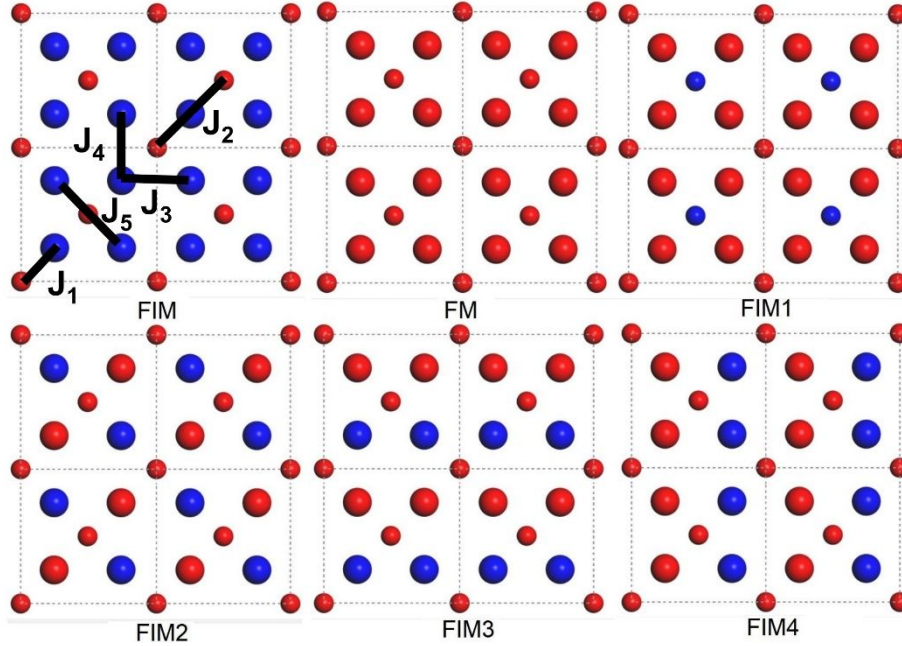

**Figure S5.** Computation of next-nearest and father exchange parameters for 2D Cr-DPP. Besides the nearest exchange parameter  $J_1$ , we consider other four exchange parameters  $J_2$ ,  $J_3$ ,  $J_4$ ,  $J_5$  as labeled in the figure. To get these values, other four ferrimagnetic states labelled as FIM1, FIM2, FIM3, FIM4 are calculated, which are found 149.9, 146.8, 150.0, 161.1 meV higher in energy than the ground FIM state. Accordingly, we obtain the exchange parameters  $J_2 = -0.4$  meV,  $J_3 = -1.5$  meV,  $J_4 = -7.1$  meV and  $J_5 = 0.1$  meV, being at least one order of magnitude smaller than  $J_1$  (-20.5 meV).

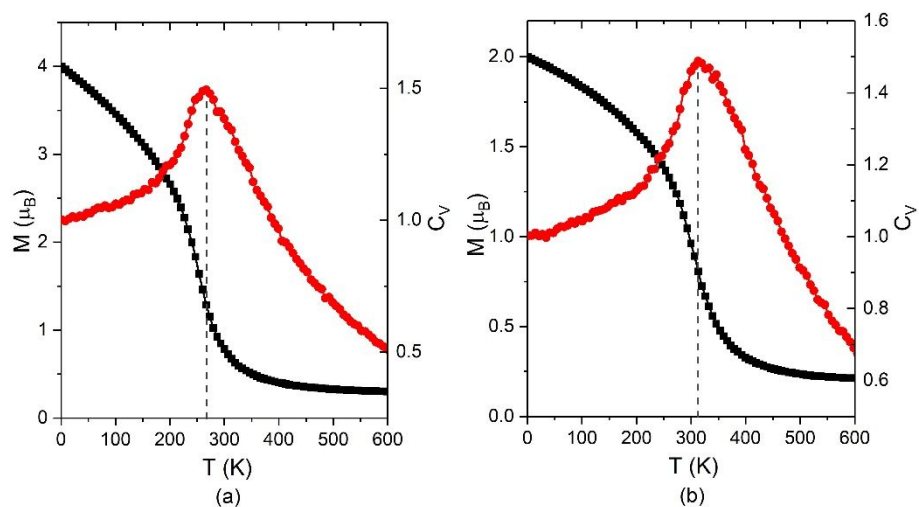

**Figure S6.** Variation of magnetic moment ( $M$ ) per unit cell (black) and specific heat ( $C_v$ ) (red) with respect to temperature from classic Heisenberg model Monte Carlo (MC) simulations for -CN modified 2D (a) Cr-DPP and (b) V-DPP at 5% compressive strain. The exchange energy is evaluated to be 1.002 and 1.209 eV, and the Curie temperature identified as the peak position of  $C_v$  plot is 270 and 310 K for modified 2D Cr and V-DPP, respectively.

**Table S1.** A list of theoretically predicted two dimensional intrinsic ferromagnetic semiconductors in the literature. The name/chemical formula, estimated Curie temperature ( $T_c$ ), the method for predicting  $T_c$ , *i.e.* mean field theory (MFT), Ising model or classic Heisenberg model Monte Carlo simulation, and the reference number are given.

|                     | $T_c/K$ | method     | reference |
|---------------------|---------|------------|-----------|
| graphene            | 278     | MFT        | Ref. 11   |
| CrSnTe <sub>3</sub> | 170     | Ising      | Ref.12    |
| CrGaTe <sub>3</sub> | 71      | Ising      | Ref.13    |
| NiCl <sub>2</sub>   | 138     | Ising      | Ref.14    |
| MnO <sub>2</sub>    | 140     | Ising      | Ref.15    |
| MnSe <sub>2</sub>   | 250     | Ising      | Ref.16    |
| CrOCl               | 160     | Ising      | Ref.17    |
| CrSeBr              | 500     | Ising      | Ref.18    |
| CrWI <sub>6</sub>   | 180     | Heisenberg | Ref.19    |
| NbS <sub>2</sub>    | 141     | Heisenberg | Ref.20    |

## References

- (1) Perdew, J. P.; Burke, K.; Ernzerhof, M. Generalized Gradient Approximation Made Simple. *Phys. Rev. Lett.* **1996**, 77, 3865-3868.
- (2) Grimme, S.; Antony, J.; Ehrlich, S.; Krieg, S. A Consistent and Accurate Ab Initio Parametrization of Density Functional Dispersion Correction (DFT-D) for the 94 Elements H-Pu. *J. Chem. Phys.* **2010**, 132, 154104.
- (3) Grimme, S.; Ehrlich, S.; Goerigk, L. Effect of the Damping Function in Dispersion Corrected Density Functional Theory. *J. Comp. Chem.* **2011**, 32, 1456-1465.
- (4) Liechtenstein, A. I.; Anisimov, V. I.; Zaanen, J. Density-Functional Theory and Strong Interactions: Orbital Ordering in Mott-Hubbard Insulators. *Phys. Rev. B* **1995**, 52, 5467-5470.
- (5) Kresse, G. Furthmüller, J. Efficient Iterative Schemes for Ab Initio Total-Energy Calculations Using a Plane-Wave Basis Set. *Phys. Rev. B*, **1996**, 54, 11169-11186.
- (6) Zhou, J.; Sun, Q. Magnetism of Phthalocyanine-Based Organometallic Single Porous Sheet. *J. Am. Chem. Soc.* **2011**, 133, 15113-15119.

- (7) Heyd, J.; Scuseria, G. E.; Ernzerhof, M. Hybrid Functionals Based on a Screened Coulomb Potential. *J. Chem. Phys.* **2003**, *118*, 8207-8215.
- (8) Heyd, J.; Scuseria, G. E.; Ernzerhof, M. Erratum: "Hybrid Functionals Based on a Screened Coulomb Potential" [*J. Chem. Phys.* 118, 8207 (2003)]. *J. Chem. Phys.* **2006**, *124*, 219906.
- (9) Blöchl, P. E. Projector Augmented-Wave Method. *Phys. Rev. B* **1994**, *50*, 17953-17979.
- (10) Togo, A.; Tanaka, I. First Principles Phonon Calculations in Materials Science. *Scr. Mater.* **2015**, *108*, 1-5.
- (11) Zhou, J.; Wang, Q.; Sun, Q.; Chen, X. S.; Kawazoe, Y.; Jena, P. Ferromagnetism in Semihydrogenated Graphene Sheet. *Nano Lett.* **2009**, *9*, 3867-3870.
- (12) Zhuang, H. L.; Xie, Y.; Kent, P. R. C.; Ganesh, P. Computational Discovery of Ferromagnetic Semiconducting Single-Layer CrSnTe<sub>3</sub>. *Phys. Rev. B* **2015**, *92*, 035407.
- (13) Yu, M.; Liu, X.; Guo, W. Novel Two-Dimensional Ferromagnetic Semiconductors: Ga-Based Transition-Metal Trichalcogenide Monolayers. *Phys. Chem. Chem. Phys.* **2018**, *20*, 6374-6382.
- (14) Kulish, V. V.; Huang, W. Single-Layer Metal Halides MX<sub>2</sub> (X = Cl, Br, I): Stability and Tunable Magnetism from First Principles And Monte Carlo Simulations. *J. Mater. Chem. C* **2017**, *5*, 8734-8741.
- (15) Kan, M.; Zhou, J.; Sun, Q.; Kawazoe, Y.; Jena, P. The Intrinsic Ferromagnetism in a MnO<sub>2</sub> Monolayer. *J. Phys. Chem. Lett.* **2013**, *4*, 3382-3386.
- (16) Kan, M.; Adhikari, S.; Sun, Q. Ferromagnetism in MnX<sub>2</sub> (X = S, Se) Monolayers. *Phys. Chem. Chem. Phys.* **2014**, *16*, 4990-4494.
- (17) Miao, N.; Xu, B.; Zhu, L.; Zhou, J.; Sun, Z. 2D Intrinsic Ferromagnets from van der Waals Antiferromagnets. *J. Am. Chem. Soc.* **2018**, *140*, 2417-2420.
- (18) Jiang, Z.; Wang, P.; Xing, J.; Jiang, X.; Zhao, J. Screening and Design of Novel 2D Ferromagnetic Materials with High Curie Temperature above Room Temperature. *ACS Appl. Mater. Interfaces* **2018**, *10*, 39032-39039.

- (19) Huang, C.; Feng, J.; Wu, F.; Ahmed, D.; Huang, B.; Xiang, H.; Deng, K.; Kan, E. Toward Intrinsic Room-Temperature Ferromagnetism in Two-Dimensional Semiconductors. *J. Am. Chem. Soc.* **2018**, *140*, 11519-11525.
- (20) Sun, Y.; Zhuo, Z.; Wu, X. Bipolar Magnetism in A Two-Dimensional NbS<sub>2</sub> Semiconductor with High Curie Temperature. *J. Mater. Chem. C* **2018**, *6*, 11401-11406.
